# Supplementary material for: Photoacoustic and Magnetic Resonance Imaging of Hybrid Manganese Dioxide-Coated Ultra-Small NaGdF4 Nanoparticles for Spatiotemporal Modulation of Hypoxia in Head and Neck Cancer
Source: PubMed Central journal article supplement (PMC7694772; doi:10.3390/cancers12113294), 2020-11-06
Supplement: cancers-12-03294-s001.pdf [file cancers-12-03294-s001.pdf]

## Supplementary Materials:

# Photoacoustic and Magnetic Resonance Imaging of Hybrid Manganese Dioxide Coated Ultra-small NaGdF<sub>4</sub> Nanoparticles for Spatiotemporal Modulation of Hypoxia in Head and Neck Cancer

Laurie. J. Rich<sup>1,†</sup>, Jossana A. Damasco<sup>2,§</sup>, Julia C. Bulmahn<sup>2</sup>, Hilliard L. Kutscher<sup>2,3,4</sup>, Paras N. Prasad<sup>2,\*</sup>, and Mukund Seshadri<sup>1,5,\*</sup>

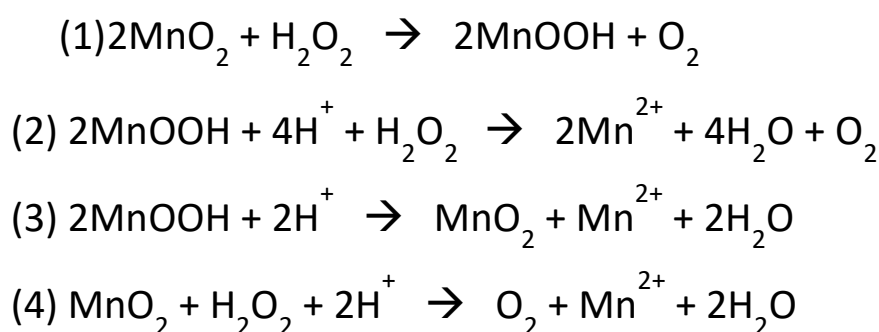

**Figure 1. Reaction scheme of MnO<sub>2</sub> with H<sub>2</sub>O under acidic conditions<sup>1-4</sup>.** Under acidic conditions, the MnO<sub>2</sub> can undergo redox reaction with H<sub>2</sub>O<sub>2</sub> (1) to form H<sub>2</sub>O, O<sub>2</sub> and Mn<sup>2+</sup> (1-3). The MnOOH facilitates the decomposition of H<sub>2</sub>O<sub>2</sub> to H<sub>2</sub>O and O<sub>2</sub> as the Mn<sup>3+</sup> is further reduced to Mn<sup>2+</sup> (2). MnOOH can also undergo disproportionation reaction to reform MnO<sub>2</sub>, and also produce Mn<sup>2+</sup> and H<sub>2</sub>O (3). The overall reaction is given in (4).

<sup>1</sup>Luo XL, Xu JJ, Zhao W, Chen HY. A novel glucose ENFET based on the special reactivity of MnO<sub>2</sub> nanoparticles. *Biosens Bioelectron.* 2004 May 15;19(10):1295-300. doi: 10.1016/j.bios.2003.11.019. PMID: 15046762.

<sup>2</sup>Fan W, Bu W, Shen B, He Q, Cui Z, Liu Y, Zheng X, Zhao K, Shi J. Intelligent MnO<sub>2</sub> Nanosheets Anchored with Upconversion Nanoprobes for Concurrent pH-/H<sub>2</sub>O<sub>2</sub>-Responsive UCL Imaging and Oxygen-Elevated Synergetic Therapy. *Adv Mater.* 2015 Jul 22;27(28):4155-61. doi: 10.1002/adma.201405141. Epub 2015 Jun 8. PMID: 26058562.

<sup>3</sup>Chen Q, Feng L, Liu J, Zhu W, Dong Z, Wu Y, Liu Z. Intelligent Albumin-MnO<sub>2</sub> Nanoparticles as pH-/H<sub>2</sub>O<sub>2</sub>-Responsive Dissociable Nanocarriers to Modulate Tumor Hypoxia for Effective Combination Therapy. *Adv Mater.* 2016 Sep;28(33):7129-36. doi: 10.1002/adma.201601902. Epub 2016 Jun 10. Erratum in: *Adv Mater.* 2018 Feb;30(8): PMID: 27283434.

<sup>4</sup>Long JW, Rhodes CP, Young AL, Rolison DR. Ultrathin, Protective Coatings of Poly(o-phenylenediamine) as Electrochemical Proton Gates: Making Mesoporous MnO<sub>2</sub> Nanoarchitectures Stable in Acid Electrolytes. *Nano Letters* 2003 3 (8), 1155-1161. DOI: 10.1021/nl0343598

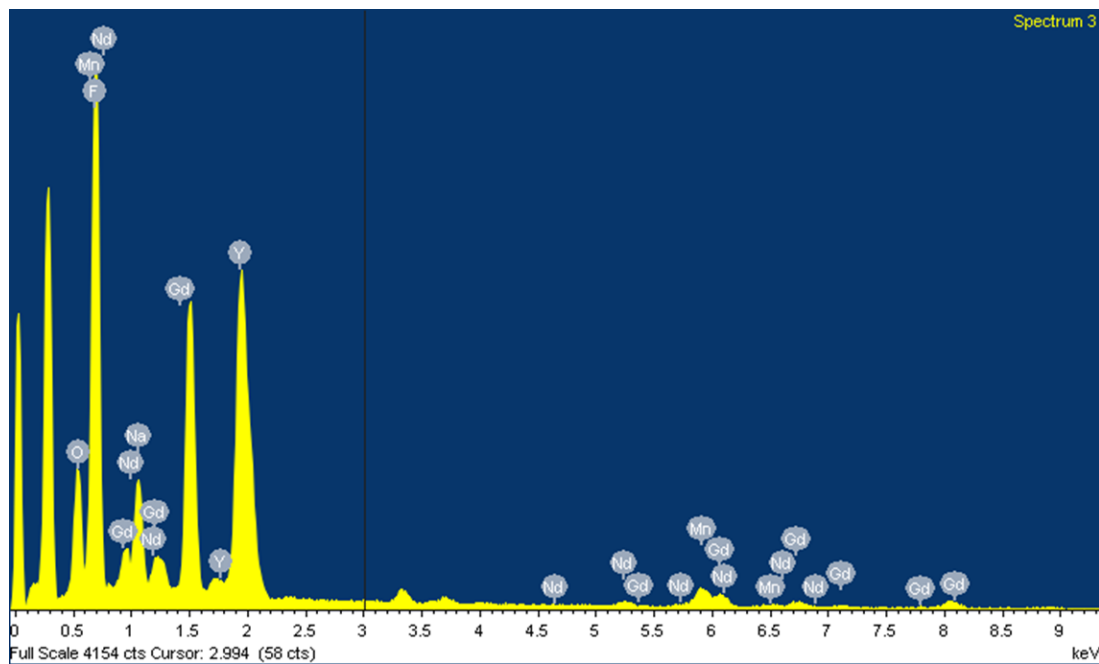

| Element | Atomic % |
|---------|----------|
| O       | 13.95    |
| F       | 68.06    |
| Na      | 4.99     |
| Mn      | 3.04     |
| Y       | 8.68     |
| Nd      | 0.3      |
| Gd      | 0.98     |

**Figure 2.** Elemental analysis using energy dispersive x-ray analysis confirmed all the elements (Y, Nd, Gd) in the synthesis were successfully incorporated in the usNP. Presence of Mn verified the successful coating of MnO<sub>2</sub>. The 1:3 ratio of Gd to Mn supports the findings of the ICP-OES analysis.

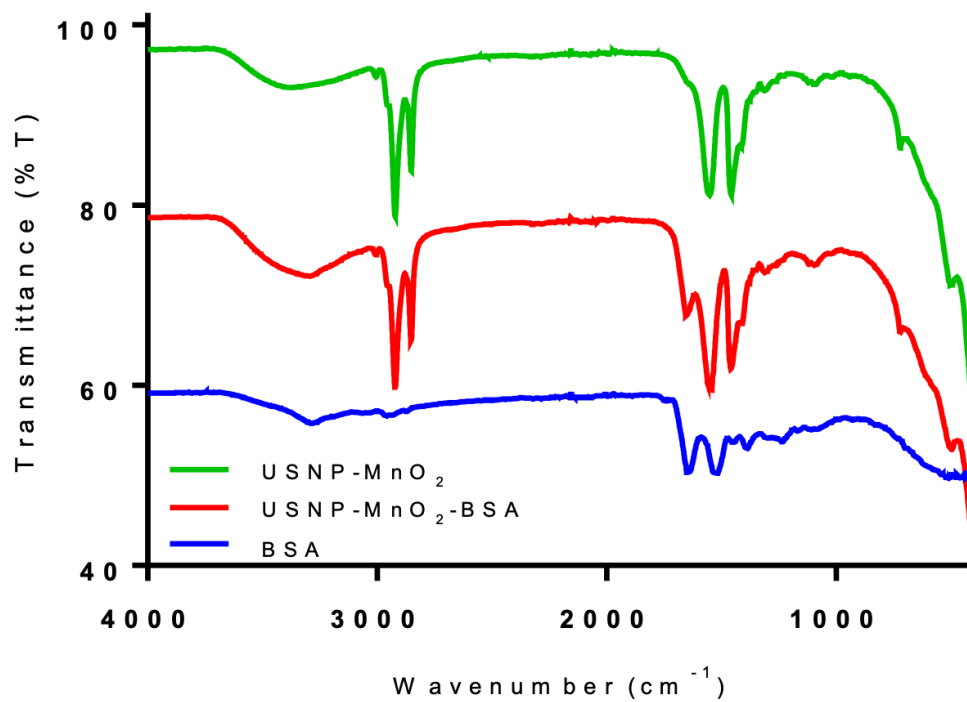

**Figure 3.** FTIR revealed presence of the  $\sim 1635\text{ cm}^{-1}$  peak, characteristic of the amide I band of BSA, in the spectra of BSA-usNP-MnO<sub>2</sub> indicating the successful formation of BSA on the surface of usNP-MnO<sub>2</sub><sup>5</sup>.

<sup>5</sup>Yu, S., Laromaine, A. & Roig, A. Enhanced stability of superparamagnetic iron oxide nanoparticles in biological media using a pH adjusted-BSA adsorption protocol. *J Nanopart Res* 16, 2484 (2014). <https://doi.org/10.1007/s11051-014-2484-1>

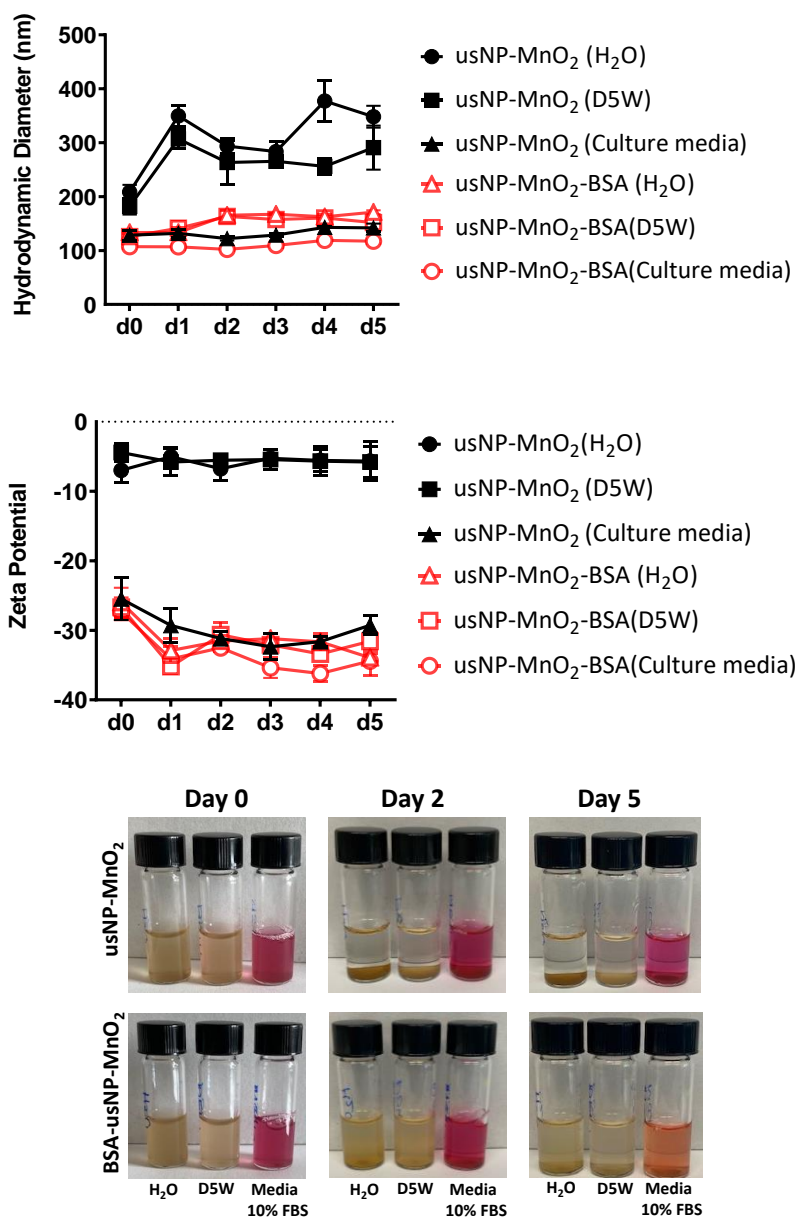

**Figure 4.** Stability study of usNP-MnO<sub>2</sub> and BSA-usNP-MnO<sub>2</sub>. The hydrodynamic diameter (A) measured from dynamic light scattering (% Number) and the zeta potential (B) showed improved stability due to the electrostatic repulsion provided by the BSA coating. The zeta potential decreased from > -10 to ~-30 with the coating of BSA. Photographs (C) of the usNP-MnO<sub>2</sub> and BSA-usNP-MnO<sub>2</sub> suspended in different solvents showed the freshly prepared nanoparticles were stable in all solvents. Over time, aggregations on the bottom were observed due to the large size of the nanostructures and desorption of BSA from the surface.

Wu, F. S.; Yue, L. L.; Cheng, K.; Chen, J.; Wong, K. L.; Wong, W. K.; Zhu, X. J. Facile Preparation of Phthalocyanine-Based Nanodots for Photoacoustic Imaging and Photothermal Cancer Therapy In Vivo. *ACS Biomater Sci Eng* 2020, 6, 5230-5239.

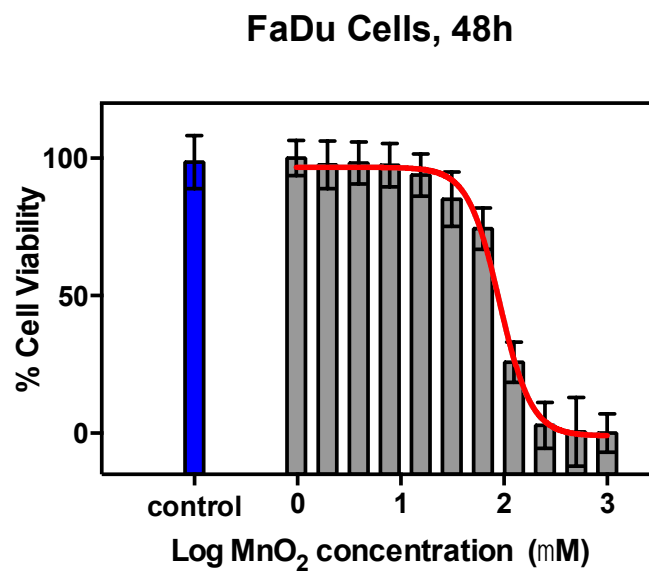

**Figure 5.** Cell viability assay of BSA-usNP-MnO<sub>2</sub>. Viability of FaDu cancer cells (10,000 cells/well) exposed to increasing concentrations of BSA-usNP-MnO<sub>2</sub> (0, 0.10, 0.97, 1.95, 3.91, 7.81, 15.6, 31.2, 62.5, 125, 250, 500, 1000  $\mu$ M MnO<sub>2</sub>) for 48 hours. IC<sub>50</sub> was determined to be at 90  $\mu$ M MnO<sub>2</sub> from the 3-(4,5-dimethylthiazol-2-yl)-2,5-diphenyltetrazolium bromide (MTT) assay.

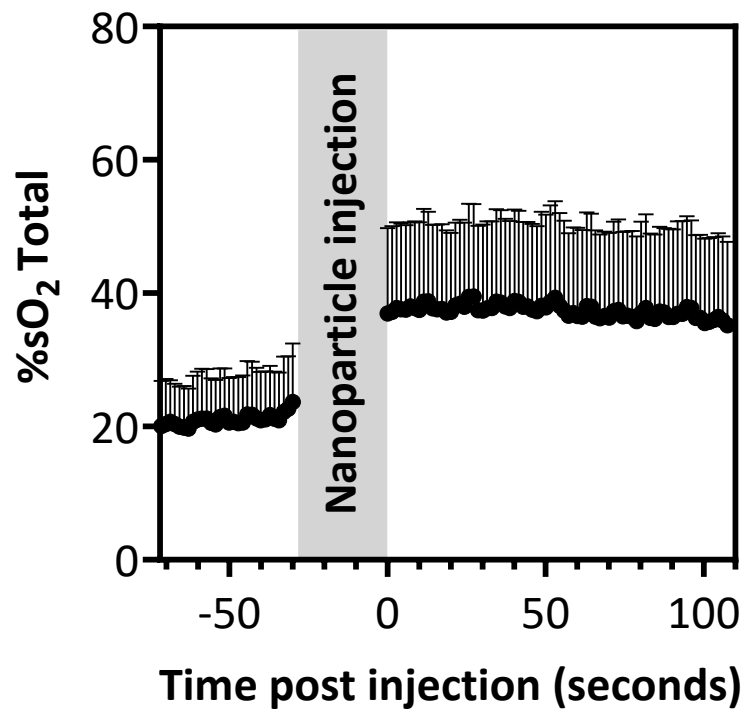

**Figure 6.** Dynamic time course of PAI measurements following IV injection of usNP-MnO<sub>2</sub> nanoparticles. These %sO<sub>2</sub> measurements suggest that tumor oxygenation levels increase rapidly and stay elevated over several minutes.
